# Supplementary material for: Tolerising cellular therapies: what is their promise for autoimmune disease?
Source: HighWire-hosted journal article supplement (doi:10.1136/annrheumdis-2018-214024), 2018-11-02
Supplement: annrheumdis-2018-214024_lay_summary.pdf [file annrheumdis-2018-214024_lay_summary.pdf]

## Cellular therapies offer hope in autoimmune disease

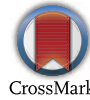

The ideal treatment for autoimmunity would be one that can induce self-tolerance before damage has occurred

### INTRODUCTION

Autoimmune disease occurs when a person's immune system attacks itself, the body's own cells and tissues. There are many different types of autoimmune disease that can happen as a result – including rheumatoid arthritis or diabetes. At the moment, drugs that suppress the immune system are used to treat and manage autoimmunity, along with medicines that treat the symptoms of autoimmune disease, such as inflammation or hormone imbalance. However, because autoimmunity is a long-term problem, the best treatment would be one that can reset the immune system before damage occurs.

Cell therapy is a new branch of medicine that uses 'tolerogenic' immune cells to correct some of the immune abnormalities. The cells come either from the patient being treated (so-called autologous cells) or from another person (allogeneic). The cells are then processed in special laboratories and their numbers multiplied before being injected back into the patient.

### HOW WAS THIS STUDY CONDUCTED?

This is a review article. This means that no special study was undertaken but the article was informed by a literature review. The authors summarised their understanding of the current situation with three types of cell therapies being developed for use in people with autoimmune disease. The cell types were: mesenchymal stromal cells, tolerogenic dendritic cells, and regulatory T cells.

### WHAT WAS THE MAIN FINDING?

Each of the three types of cell therapy reviewed has advantages and disadvantages, and some will be more suitable in particular diseases than others. For example, mesenchymal stromal cells can regenerate tissue, which may be useful in conditions such as Crohn's disease or multiple sclerosis. From looking at a number of small trials in each cell type, the authors concluded that the results so far show that cellular therapies are safe and feasible, and worth exploring in more detail.

### WHAT ARE THE LIMITATIONS?

Most of the studies outlined in this review are at the very earliest phases of clinical development. In addition, the studies the authors looked at were very small, and often did not include a control group to compare against. As with any new treatment it will be necessary to do more controlled clinical trials to confirm the benefit.

### WHAT DO THE AUTHORS PLAN ON DOING WITH THIS INFORMATION?

The authors are performing their own studies looking at cell therapies. There are also lots of other research groups working in this field – not just in autoimmunity, but in other areas of medicines such as organ transplantation.

### WHAT DOES THIS MEAN FOR ME?

If you have an autoimmune disease, these studies offer hope that in the future there may be treatments that provide long-term benefit from just one or a few treatments. However, the research is still in its infancy, and it will be a long time before any treatments based on cell therapies are widely available.

If you are interested in being involved in a clinical trial of cell therapies, you should speak to your doctor.

**Disclaimer:** This is a summary of a scientific article written by a medical professional (“the Original Article”). The Summary is written to assist non medically trained readers to understand general points of the Original Article. It is supplied “as is” without any warranty. You should note that the Original Article (and Summary) may not be fully relevant nor accurate as medical science is constantly changing and errors can occur. It is therefore very important that readers not rely on the content in the Summary and consult their medical professionals for all aspects of their health care and only rely on the Summary if directed to do so by their medical professional. Please view our full Website Terms and Conditions. <http://www.bmj.com/company/legal-information/>

Date prepared: April 2019

Summary based on research article published on: 2 November 2018

**From:** Mosanya CH and Isaacs JD. Tolerising cellular therapies: what is their promise for autoimmune disease? *Ann Rheum Dis* 2019;78:297–310. doi:10.1136/annrheumdis-2018-214024

Copyright © 2019 BMJ Publishing Group Ltd & European League Against Rheumatism. Medical professionals may print copies for their and their patients and students non commercial use. Other individuals may print a single copy for their personal, non commercial use. For other uses please contact our [Rights and Licensing Team](#).
